# Supplementary material for: TRIM8 restores p53 tumour suppressor function by blunting N-MYC activity in chemo-resistant tumours
Source: PubMed Central journal article supplement (PMC5359838; doi:10.1186/s12943-017-0634-7), 2017-03-21
Supplement: 12943_2017_634_MOESM5_ESM.pdf [file 12943_2017_634_MOESM5_ESM.pdf]

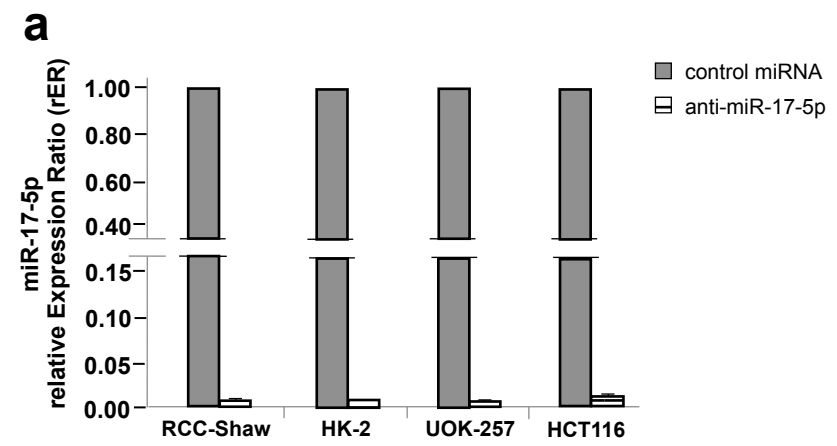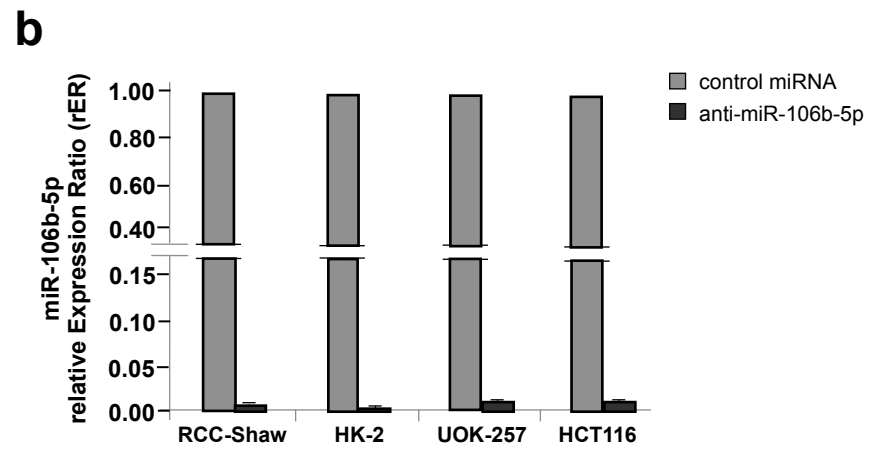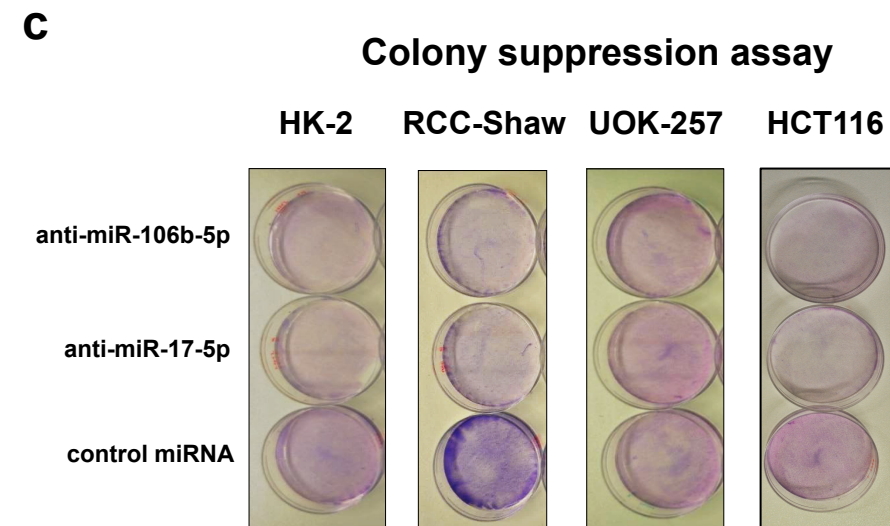

Figure S4
