# Supplementary material for: TRIM8 restores p53 tumour suppressor function by blunting N-MYC activity in chemo-resistant tumours
Source: PubMed Central journal article supplement (PMC5359838; doi:10.1186/s12943-017-0634-7), 2017-03-21
Supplement: 12943_2017_634_MOESM6_ESM.pdf [file 12943_2017_634_MOESM6_ESM.pdf]

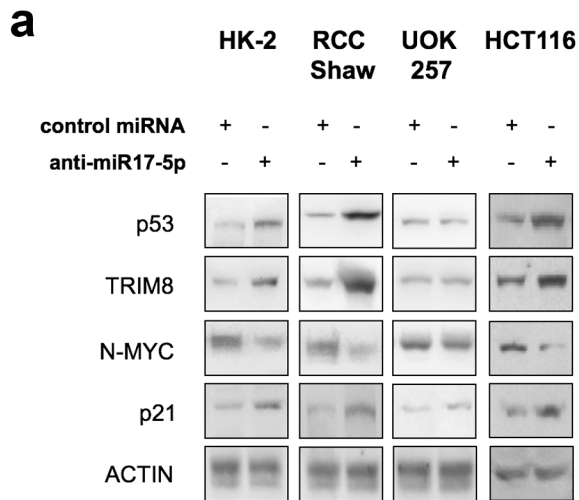

Relative density

|       |   |     |   |     |   |     |   |     |
|-------|---|-----|---|-----|---|-----|---|-----|
| p53   | 1 | 3.1 | 1 | 6.9 | 1 | 1.0 | 1 | 4.1 |
| TRIM8 | 1 | 3.3 | 1 | 11  | 1 | 1.4 | 1 | 2.4 |
| N-MYC | 1 | 0.3 | 1 | 0.3 | 1 | 1.1 | 1 | 0.4 |
| p21   | 1 | 2.5 | 1 | 3.6 | 1 | 2.3 | 1 | 3.6 |

|               |                |               |                |               |                |               |                |
|---------------|----------------|---------------|----------------|---------------|----------------|---------------|----------------|
| Control miRNA | Anti- miR17-5p | Control miRNA | Anti- miR17-5p | Control miRNA | Anti- miR17-5p | Control miRNA | Anti- miR17-5p |
|---------------|----------------|---------------|----------------|---------------|----------------|---------------|----------------|

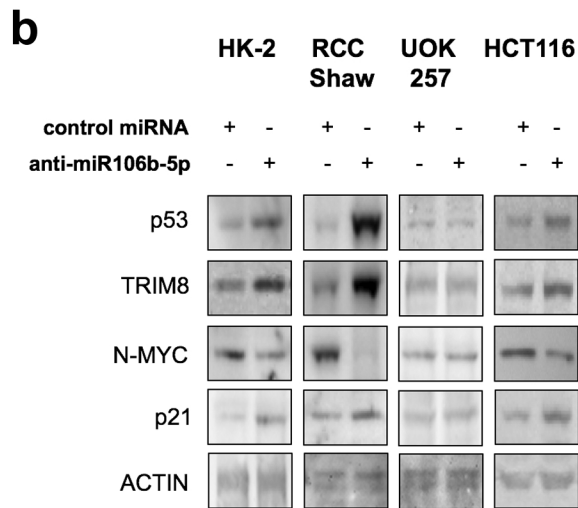

Relative density

|       |   |     |   |     |   |     |   |     |
|-------|---|-----|---|-----|---|-----|---|-----|
| p53   | 1 | 6.1 | 1 | 7.4 | 1 | 0.8 | 1 | 1.9 |
| TRIM8 | 1 | 1.7 | 1 | 2.1 | 1 | 0.8 | 1 | 1.3 |
| N-MYC | 1 | 0.4 | 1 | 0.1 | 1 | 0.8 | 1 | 0.6 |
| p21   | 1 | 2.1 | 1 | 1.3 | 1 | 0.9 | 1 | 1.9 |

|               |                |               |                |               |                |               |                |
|---------------|----------------|---------------|----------------|---------------|----------------|---------------|----------------|
| Control miRNA | Anti- miR17-5p | Control miRNA | Anti- miR17-5p | Control miRNA | Anti- miR17-5p | Control miRNA | Anti- miR17-5p |
|---------------|----------------|---------------|----------------|---------------|----------------|---------------|----------------|

Figure S5
