# Supplementary material for: TRIM8 restores p53 tumour suppressor function by blunting N-MYC activity in chemo-resistant tumours
Source: Springer Nature journal article supplement (doi:10.1186/s12943-017-0634-7), 2017-03-21
Supplement: MOESM4 [file 12165062]

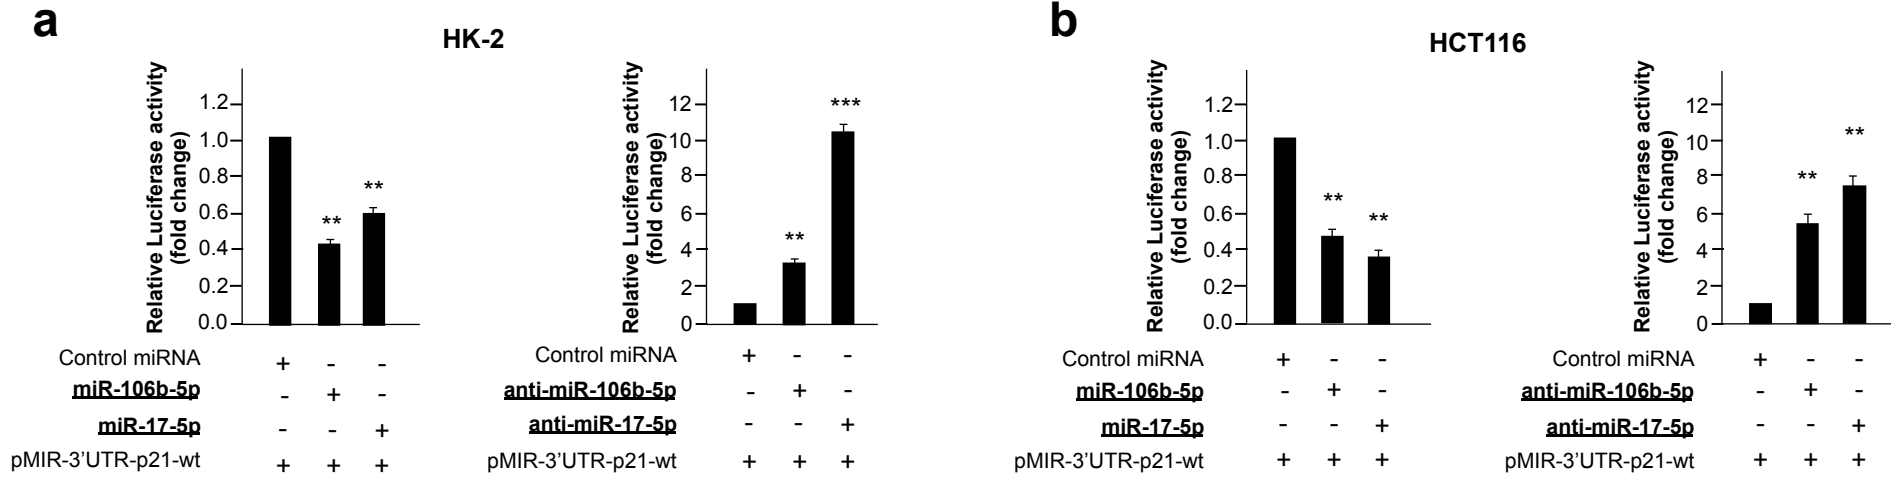

Figure S3
