# Supplementary material for: TRIM8 restores p53 tumour suppressor function by blunting N-MYC activity in chemo-resistant tumours
Source: Springer Nature journal article supplement (doi:10.1186/s12943-017-0634-7), 2017-03-21
Supplement: MOESM10 [file 12165062]

# RCC-Shaw

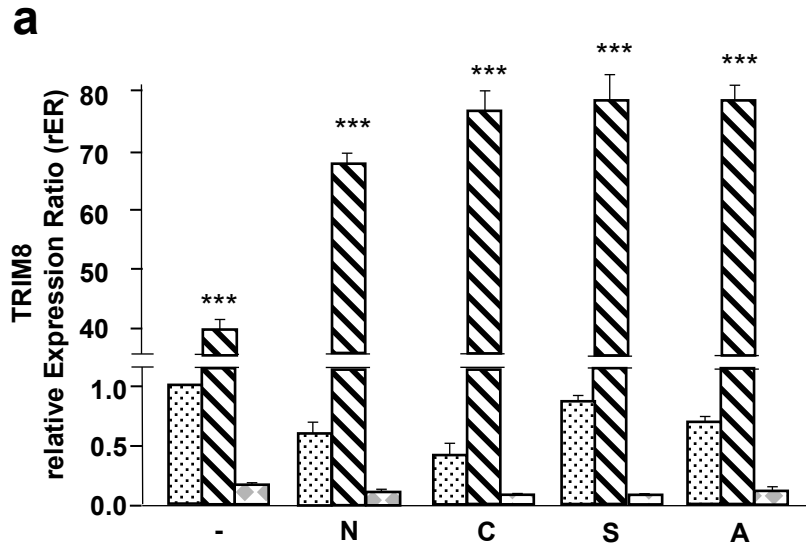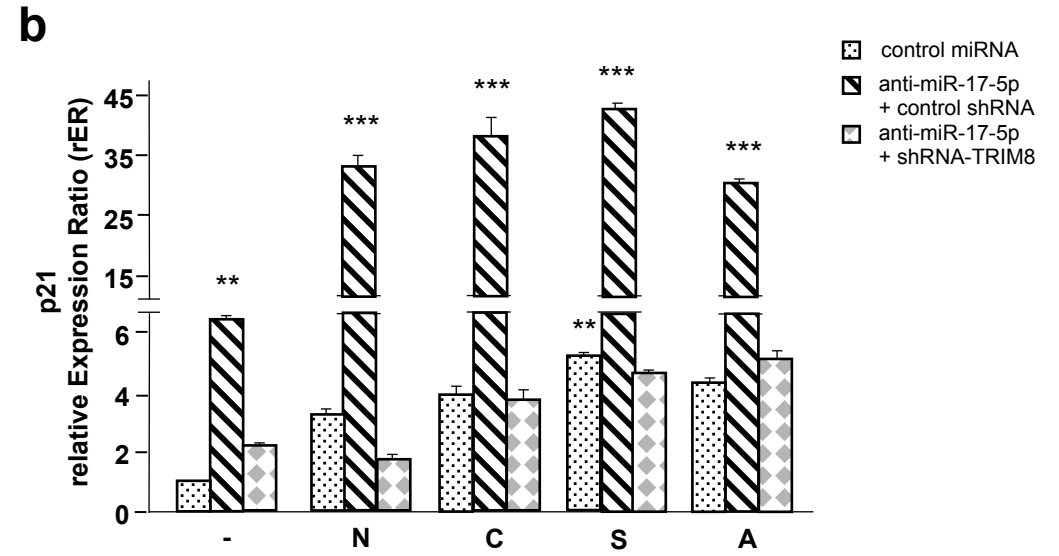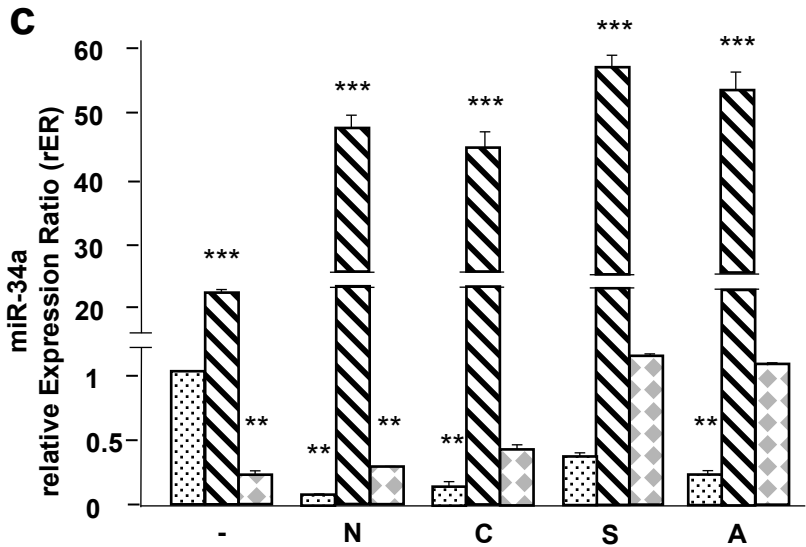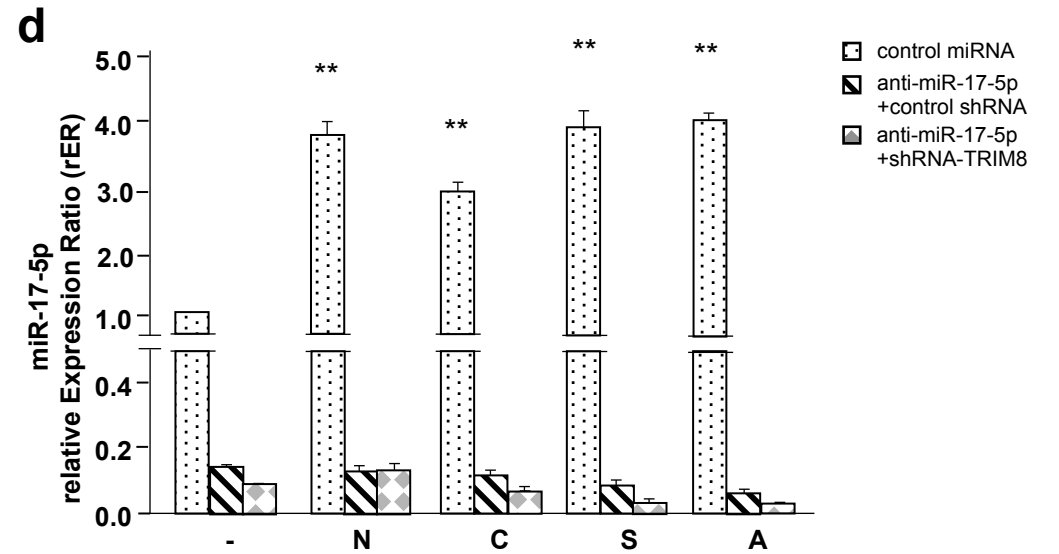

Figure S9
